# Supplementary material
Source: PubMed Central journal article supplement (PMC3779762)
Supplement: supp_M113.489443_jbc.M113.489443-1.pdf [file supp_M113.489443_jbc.M113.489443-1.pdf]

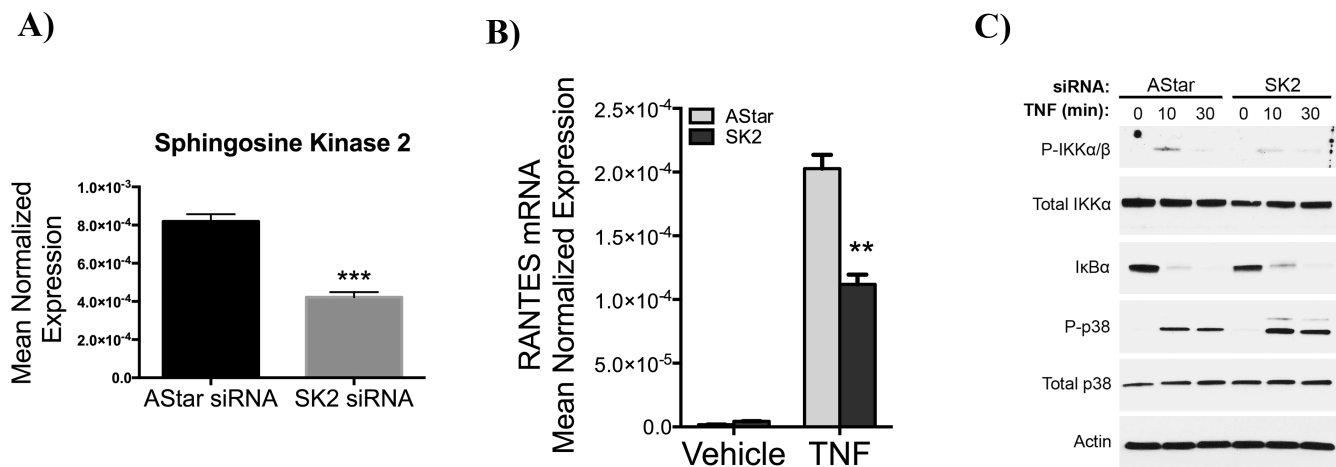

**FIGURE S1**

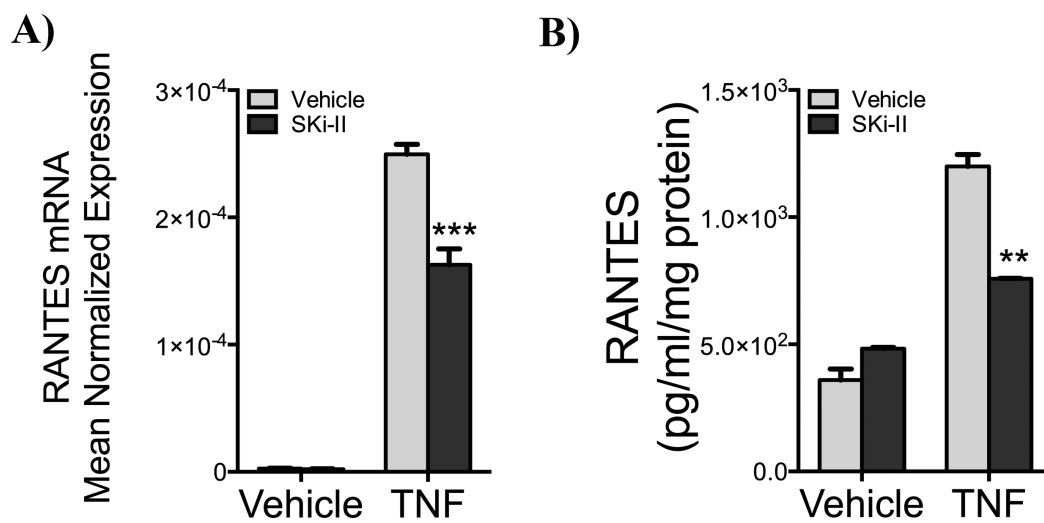

**FIGURE S2**

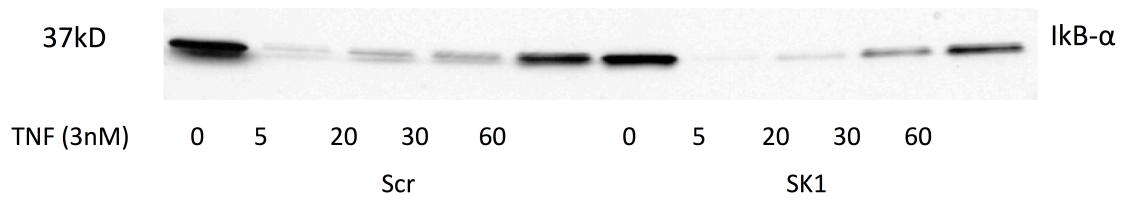

**FIGURE S3**

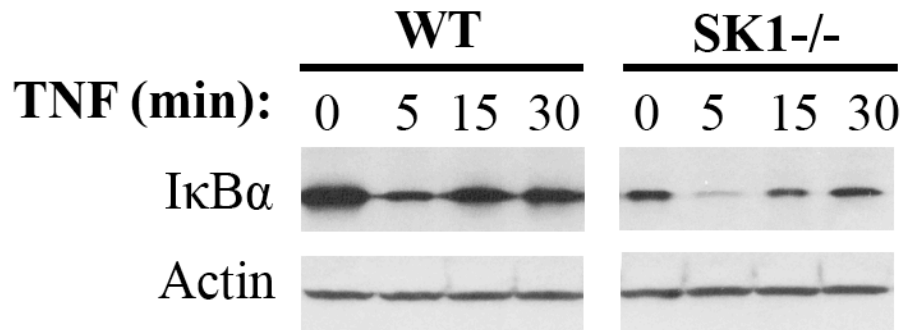

**FIGURE S4**

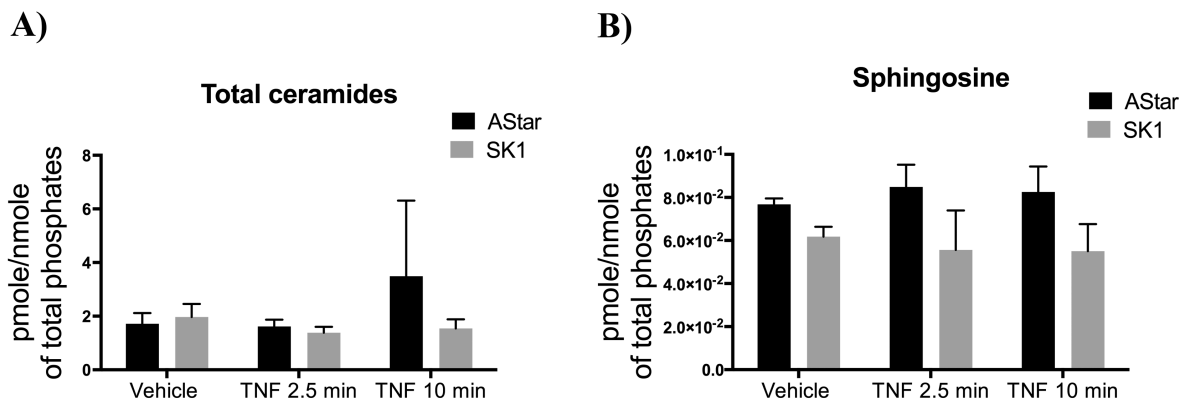

**FIGURE S5**

## SUPPLEMENTAL FIGURE LEGENDS

**Figure S1. Effect of SK2 on RANTES induction, acute NF- $\kappa$ B activation and p38 MAPK phosphorylation.** A) HeLa cells were treated with 20nM Astar or SK1 siRNA for 48 h and SK1 mRNA levels were assessed by qRT-PCR. Data are presented as mean  $\pm$  SEM from 3 independent experiments performed in duplicate. B) HeLa cells were treated with 20nM Astar or SK2 siRNA for 48h, treated with vehicle (PBS) or TNF (20ng/ml) for 24h and the levels of RANTES mRNA assessed by qRT-PCR. Data represent mean  $\pm$  SEM from 3 independent experiments. C) HeLa cells were treated with 20nM Astar or SK2 siRNA for 48h, treated with vehicle (PBS) or TNF (20ng/ml) for 0, 10 or 30 minutes. Early downstream signals of TNF including IKK $\alpha$ / $\beta$  phosphorylation, I $\kappa$ B $\alpha$  degradation, phospho-p38 and total p38 MAPK were assessed by immunoblot with actin as loading control. Each blot is representative of 2 independent experiments (\*\* p<0.01, \*\*\* p<0.001)

**Figure S2. Effect of the sphingosine kinase inhibitor Ski-II on RANTES mRNA and protein levels.** HeLa cells were incubated with DMSO or Ski-II (10 $\mu$ M) overnight prior to treatment with vehicle (PBS) or TNF (20ng/ml) for 24h. **A)** RANTES mRNA levels were assessed by qRT-PCR. Data shown are mean  $\pm$  SEM of 3 independent experiments. **B)** Cells were stimulated in serum-free media and RANTES levels in the media were determined by ELISA. Data represent mean  $\pm$  SEM of 2 independent experiments performed in duplicate (\*\* p<0.01, \*\*\* p<0.001)

**Figure S3: Loss of SK1 does not prevent I $\kappa$ B degradation in A549 cells.** A549 cells were treated with 20nM negative control (Scr) or SK1 siRNA for 48h prior to stimulation with TNF (50ng/ml) as indicated. Protein lysates were prepared and equal amounts of protein analyzed for I $\kappa$ B $\alpha$  levels by immunoblot as described in ‘Experimental Procedures.’

**Figure S4. The lack of requirement of SK1 for TNF-mediated activation of NF- $\kappa$ B is not due to clone specific effects.** MEFs derived from WT or SK1<sup>-/-</sup> mice were treated with TNF (50ng/ml) as shown, and I $\kappa$ B $\alpha$  levels were assessed by immunoblot with actin as a loading control. The blot shown is representative of 3 independent experiments.

**Figure S5. Effect of TNF on total ceramides and sphingosine in HeLa cells lacking SK1.** HeLa cells were treated with 20nM Astar or SK1 siRNA for 48h prior to treatment with vehicle (PBS) or TNF (20ng/ml) for 2.5 or 10 min. Cellular lipids were directly extracted and **A)** Total ceramide levels and **B)** sphingosine levels were analyzed by tandem LC/MS mass spectrometry. Lipids were normalized to nmol of total lipid phosphate as described in Experimental Procedures. Data represent mean  $\pm$  SEM of 2 independent experiments performed in duplicate.

| Cytokine/Chemokine | Fold increase upon TNF treatment with respect to Astar non-treated cells |           |
|--------------------|--------------------------------------------------------------------------|-----------|
|                    | Astar                                                                    | SK1 siRNA |
| ADIPOQ             | 1.52                                                                     | 1.75      |
| BMP2               | 1.52                                                                     | -1.13     |
| BMP4               | -1.33                                                                    | -2.28     |
| BMP6               | 1.51                                                                     | 1.74      |
| BMP7               | -1.33                                                                    | 3.55      |
| C5                 | -1.26                                                                    | -2.21     |
| CCL1               | -1.32                                                                    | 3.38      |
| CCL11              | 3.04                                                                     | 7.05      |
| CCL13              | 3.00                                                                     | 3.45      |
| CCL17              | -2.63                                                                    | 1.76      |
| CCL18              | 3.00                                                                     | 6.95      |
| CCL19              | -1.33                                                                    | 1.75      |
| CCL2               | 3.00                                                                     | 3.50      |
| CCL20              | 11.99                                                                    | 27.63     |
| CCL21              | 1.52                                                                     | 1.71      |
| CCL22              | 6.08                                                                     | 6.91      |
| CCL24              | 3.00                                                                     | 3.48      |
| CCL3               | 1.50                                                                     | 1.74      |
| CCL5               | 49.32                                                                    | 113.61    |
| CCL7               | 1.51                                                                     | 3.45      |
| CCL8               | 1.51                                                                     | 3.48      |
| CD40LG             | -1.33                                                                    | 1.75      |
| CNTF               | 3.02                                                                     | 1.75      |
| CSF1               | 3.04                                                                     | 7.05      |
| CSF2               | 3.02                                                                     | 7.00      |
| CSF3               | 5.91                                                                     | 3.45      |
| CX3CL1             | 1.51                                                                     | 1.70      |
| CXCL1              | 48.30                                                                    | 110.51    |
| CXCL10             | 193.21                                                                   | 890.21    |
| CXCL11             | 96.60                                                                    | 442.03    |
| CXCL12             | -2.69                                                                    | 1.74      |
| CXCL13             | 1.52                                                                     | -1.14     |
| CXCL16             | 3.02                                                                     | 13.72     |
| CXCL2              | 23.98                                                                    | 55.64     |
| CXCL5              | 1.49                                                                     | -1.15     |
| CXCL9              | 1.52                                                                     | 1.74      |
| FASLG              | 23.98                                                                    | 3.48      |
| GPI                | 1.51                                                                     | -1.17     |
| IFNA2              | 1.51                                                                     | 1.76      |
| IFNG               | 1.55                                                                     | 1.78      |
| IL10               | 1.52                                                                     | 1.73      |
| IL11               | 3.02                                                                     | 3.48      |
| IL12A              | 3.00                                                                     | 3.45      |
| IL12B              | 3.02                                                                     | -1.16     |
| IL13               | 3.04                                                                     | 1.76      |

|           |       |        |
|-----------|-------|--------|
| IL15      | 1.50  | 1.71   |
| IL16      | 1.50  | 1.74   |
| IL17A     | -1.33 | -1.15  |
| IL17F     | 2.98  | 1.73   |
| IL18      | 1.51  | 1.74   |
| IL1A      | 12.08 | 27.82  |
| IL1B      | 6.00  | 13.81  |
| IL1RN     | 6.04  | 13.72  |
| IL2       | 1.49  | 1.71   |
| IL21      | -2.60 | 1.73   |
| IL22      | 1.54  | 7.20   |
| IL23A     | 3.04  | 3.45   |
| IL24      | 1.52  | 3.53   |
| IL27      | -1.34 | 1.71   |
| IL3       | 1.51  | 1.75   |
| IL4       | -1.32 | -1.14  |
| IL5       | 1.51  | 1.73   |
| IL6       | 12.16 | 14.10  |
| IL7       | 3.06  | 7.00   |
| IL8       | 97.95 | 225.66 |
| IL9       | -1.33 | 1.71   |
| LIF       | 3.04  | 3.50   |
| LTA       | 1.52  | -1.13  |
| LTB       | 3.00  | 6.86   |
| MIF       | 1.50  | 1.71   |
| MSTN      | 3.30  | 3.50   |
| NODAL     | 1.52  | -4.93  |
| OSM       | 1.50  | -1.16  |
| PPBP      | -1.33 | -1.13  |
| SPP1      | -1.33 | 1.73   |
| TGFB2     | 1.50  | 1.74   |
| THPO      | 1.49  | 1.74   |
| TNF       | 12.08 | 27.82  |
| TNFRSF11B | 2.98  | 3.48   |
| TNFSF10   | 3.02  | 13.81  |
| TNFSF11   | 3.06  | 3.48   |
| TNFSF13B  | 5.95  | 27.44  |
| VEGFA     | 1.51  | 1.75   |
| XCL1      | 5.87  | -1.25  |
| ACTB      | -1.29 | -1.13  |
| B2M       | 1.53  | 1.75   |
| GAPDH     | -1.35 | -2.33  |
| HPRT1     | 1.50  | 1.73   |
| RPLP0     | -1.32 | -1.15  |
| HGDC      | 2.90  | -1.18  |

**Supplementary Table 1: Selected Cytokines and Chemokines fold changes upon TNF treatment of the array done on AStar or SK1 siRNA transfected cells.**
